# Supplementary material for: Growth behavior and interface engineering for photovoltaic applications of co-evaporated Sb 2 Se 3 thin films on Mo foil
Source: Royal Society of Chemistry journal article supplement (doi:10.1039/d5ta08294c), 2025-12-26
Supplement: d5ta08294c1.pdf [file d5ta08294c1.pdf]

*Supporting Information*

**Growth Behavior and Interface Engineering for Photovoltaic Applications of Co-evaporated Sb<sub>2</sub>Se<sub>3</sub> Thin Films on Mo Foil**

Van-Quy Hoang,<sup>a,b,†</sup> Sinae Park,<sup>b,‡</sup> Jaebaek Lee,<sup>b</sup> Dae-Ho Son,<sup>b</sup> Dae-Kue Hwang,<sup>b</sup> Quynh Le-Van,<sup>a</sup> Vo Pham Hoang Huy,<sup>b</sup> Se Yun Kim,<sup>d</sup> Kee-Jeong Yang,<sup>b</sup> Jin-Kyu Kang,<sup>b</sup> Shi-Joon Sung,<sup>b,c,★</sup> and Dae-Hwan Kim<sup>b,c,★</sup>

<sup>a</sup>Center for Environmental Intelligence, College of Engineering and Computer Science, VinUniversity, Gia Lam district, Hanoi 14000, Vietnam

<sup>b</sup>Division of Energy & Environmental Technology, DGIST, Daegu 42988, Republic of Korea

<sup>c</sup>Department of Interdisciplinary Engineering, DGIST, Daegu 42988, Republic of Korea

<sup>d</sup>Department of Advanced Materials Science & Engineering, Kyungnam University, 51767, Korea

E-mail: [sjsung@dgist.ac.kr](mailto:sjsung@dgist.ac.kr), [monolith@dgist.ac.kr](mailto:monolith@dgist.ac.kr)

<sup>†</sup>Electronic supplementary information (ESI) available. See DOI: <https://doi.org/xxx>

<sup>‡</sup>These authors contributed equally to this work.

**Keywords:** Sb<sub>2</sub>Se<sub>3</sub> thin film, flexible photovoltaics, Mo foil, columnar grain growth

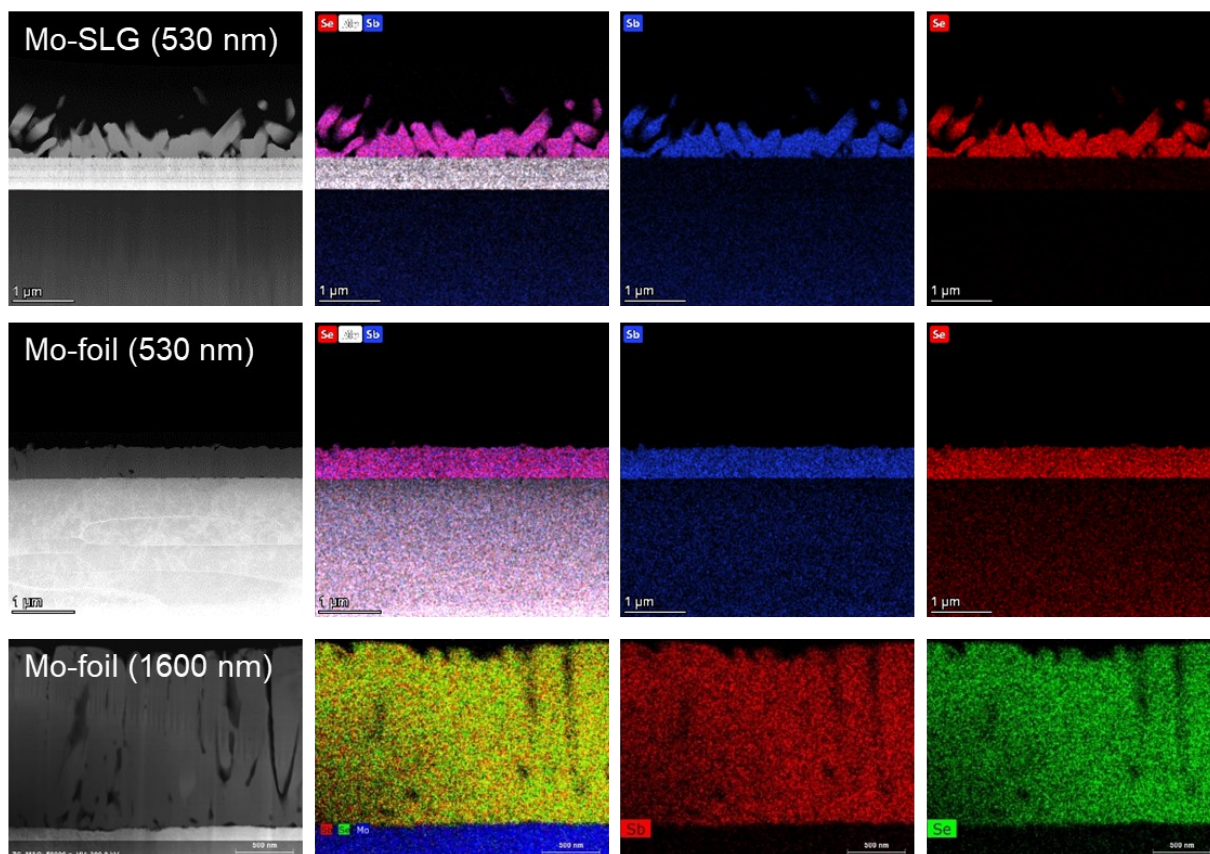

1

2 **Figure S1.** STEM EDS images of  $\text{Sb}_2\text{Se}_3$  thin films on Mo or Mo-foil. For each sample, images from  
3 left to right show the cross-sectional STEM image, composite EDX elemental map, and individual  
4 elemental maps of Sb and Se.

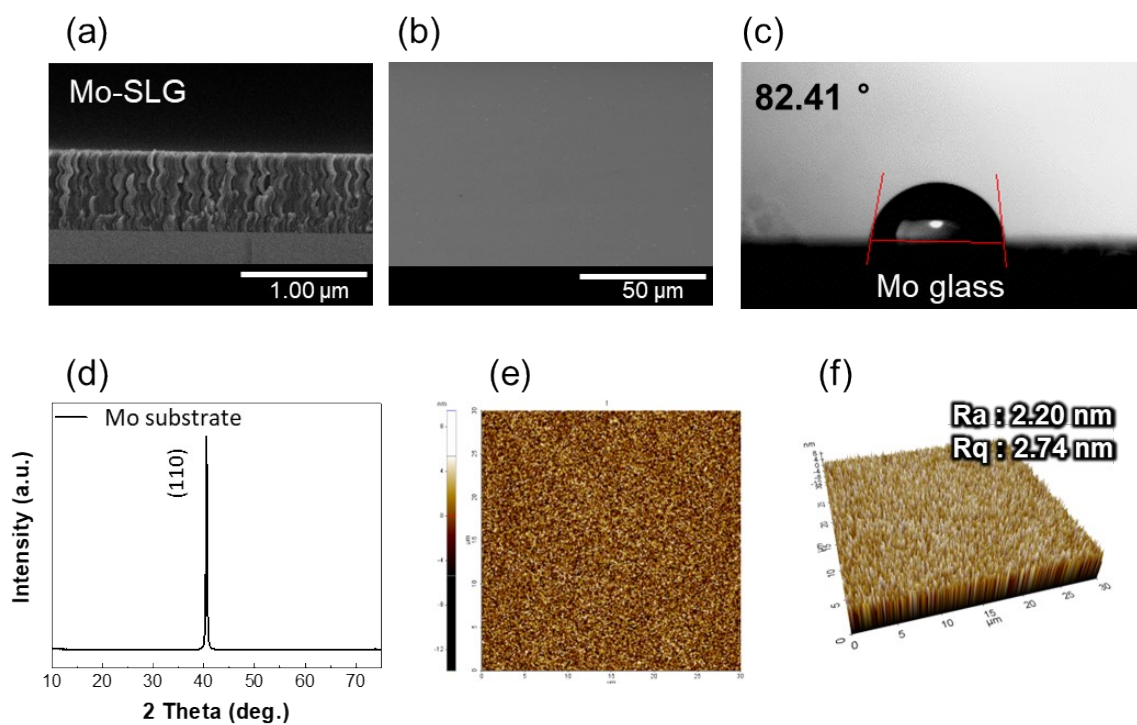

**Figure S2.** (a) Cross-sectional and (b) top-view SEM images of the Mo-SLG substrate, along with (c) the water contact angle measurement of the Mo-coated glass. (d) XRD and (e) AFM topography and (f) three-dimensional surface profile images, indicating a smooth Mo surface with low roughness.

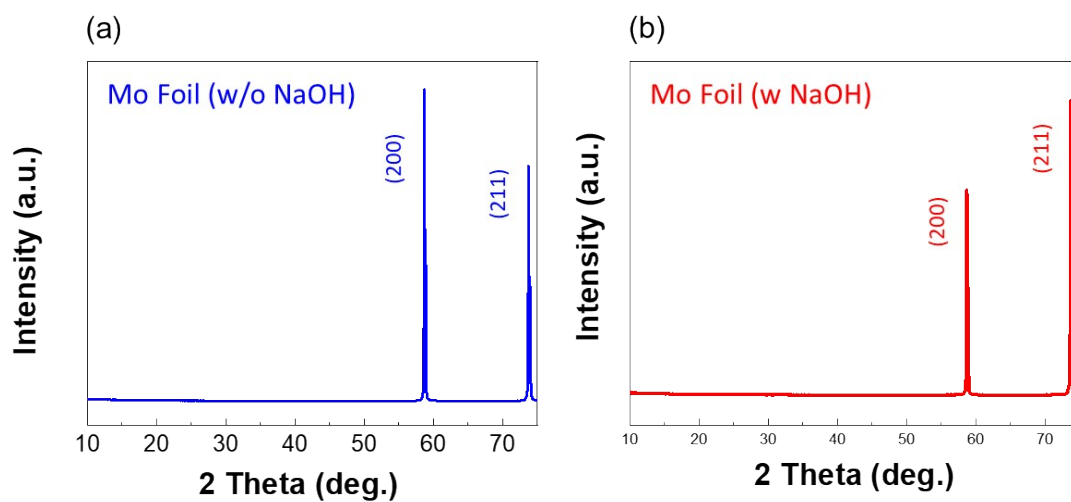

**Figure S3.** XRD data of Mo-foil substrates (a) without NaOH treatment (w/o NaOH) and (b) with NaOH treatment (w NaOH)

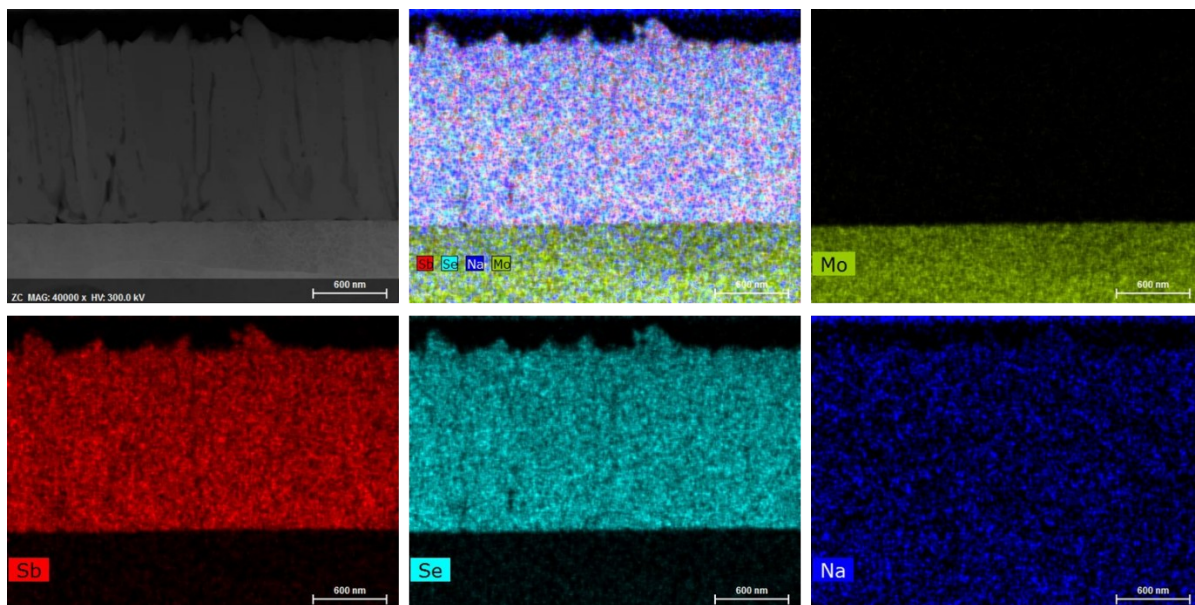

**Figure S4.** TEM-EDS images of 1600 nm-thick  $\text{Sb}_2\text{Se}_3$  films on Mo-foil with NaOH treatment showing the cross-sectional STEM image, composite EDX elemental map, and individual elemental maps of Mo, Sb, Se and Na.



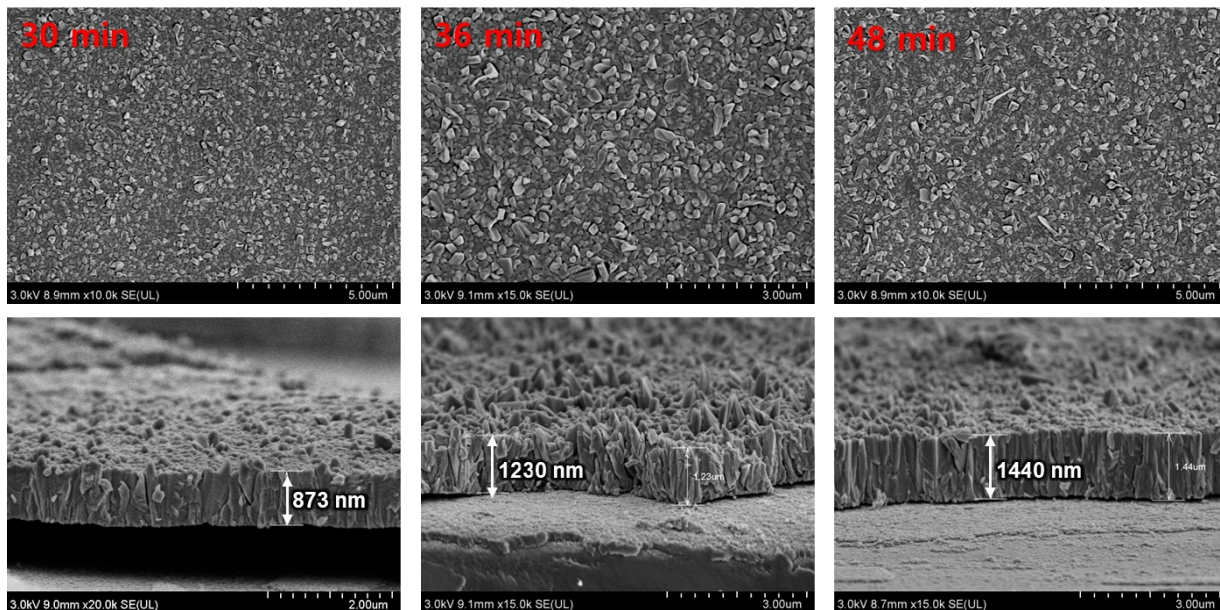

**Figure S5.** Top-view and cross-sectional SEM images of  $\text{Sb}_2\text{Se}_3$  on  $\text{MoSe}_2$  interlayer and NaOH treatment with different thickness from 873 nm to 1400 nm.

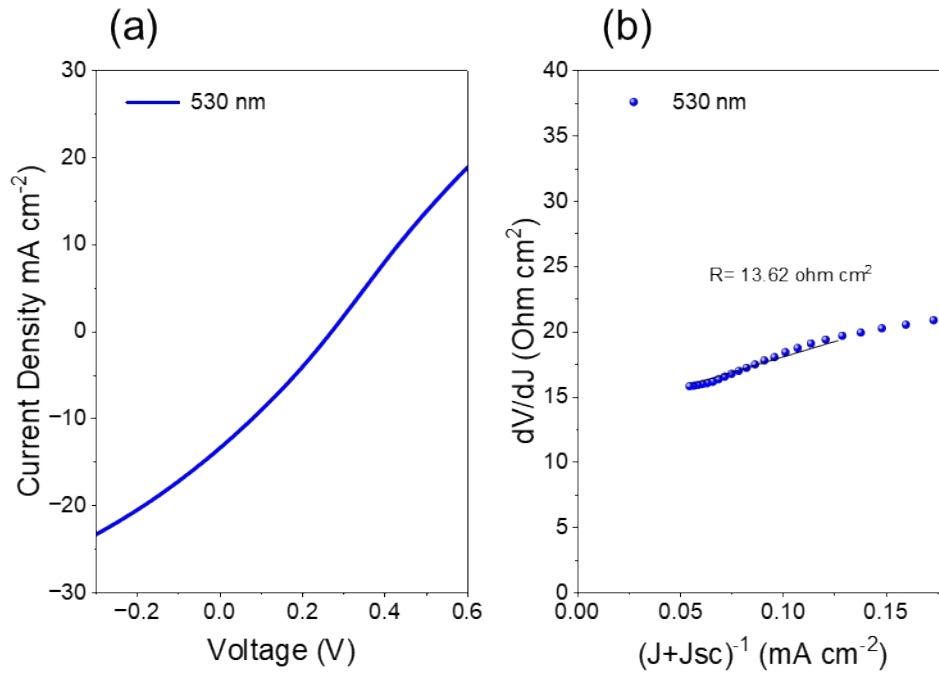

1

2 **Figure S6.** Characteristic behavior of the best-performing devices including (a)  $J$ – $V$  curves, derivative  
 3 of  $dJ/dV$  for shunt characteristic analysis of 530 nm-thick  $\text{Sb}_2\text{Se}_3$  based device.

4

5

6

7

8

9

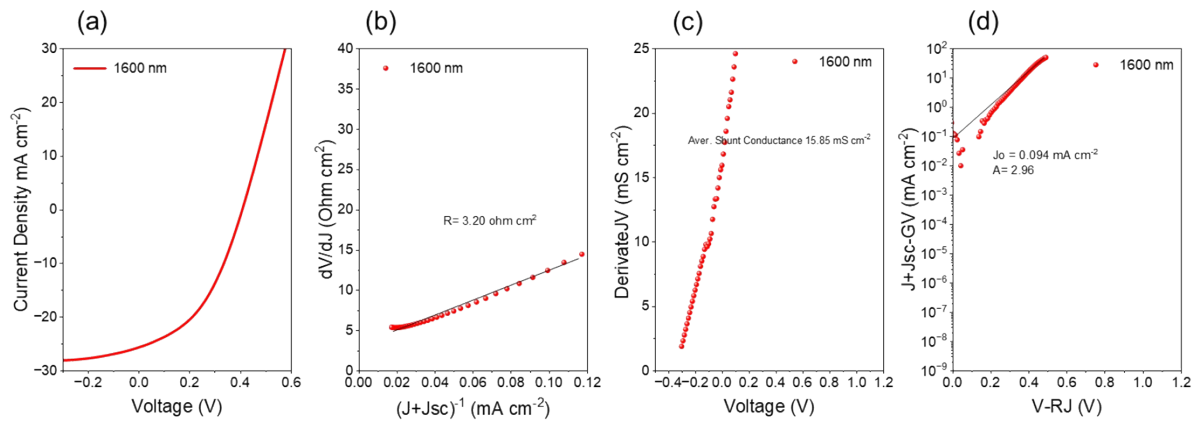

**Figure S7.** Characteristic behavior of the best-performing devices including (a)  $J$ - $V$  curves, (b) derivative of  $dJ/dV$  for shunt characteristic analysis, (c) derivatives of  $dV/dJ$  under forward bias with fitting are used to determine the series resistance and diode ideality factor and (d)  $\ln(J + J_{sc} - GV)$  versus  $(V - RJ)$  curves of 1600 nm-thick  $\text{Sb}_2\text{Se}_3$  based device.



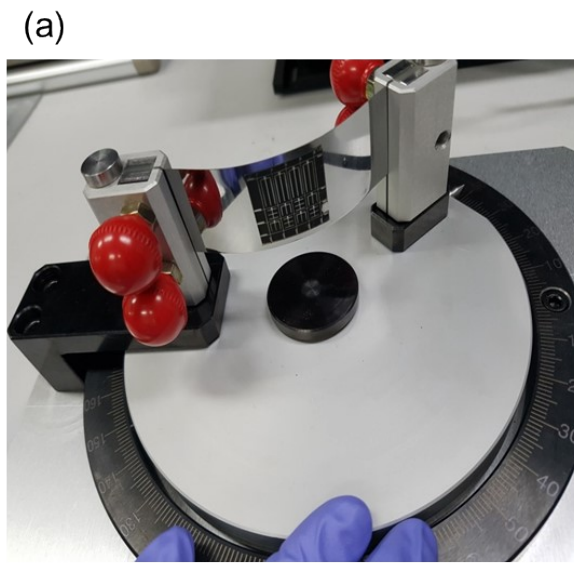

**Convex**

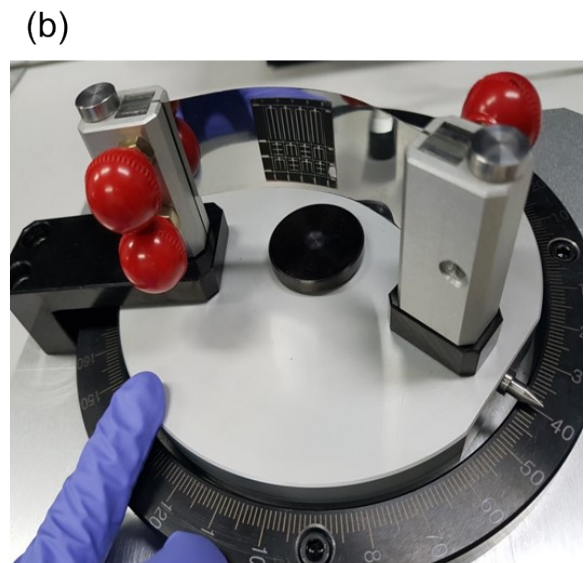

**Concave**

**Figure S8.** Experimental setups for convex (stretching) and concave (compressing) bending tests.

1 **Table S1.**  $V_{oc}$ ,  $J_{sc}$ , FF, PCE,  $R_s$  and  $R_{sh}$  of the flexible  $Sb_2Se_3$  solar cells without and with NaOH  
2 treatment.

| Treatment | $V_{oc}$<br>(V) | $J_{sc}$<br>(mA/cm <sup>2</sup> ) | FF<br>(%) | PCE<br>(%) | $R_s$<br>( $\Omega$ cm <sup>2</sup> ) | $R_{sh}$<br>( $\Omega$ cm <sup>2</sup> ) |
|-----------|-----------------|-----------------------------------|-----------|------------|---------------------------------------|------------------------------------------|
| w/o NaOH  | 0.349           | 19.00                             | 44.40     | 2.94       | 6.30                                  | 100.16                                   |
| w NaOH    | 0.341           | 20.27                             | 46.65     | 3.23       | 5.60                                  | 110.75                                   |

3
